# Supplementary material for: Novel peptidomimetics related to gonadotropin-releasing hormone (GnRH)
Source: Royal Society of Chemistry journal article supplement (doi:10.1039/c5md00259a), 2015-01-01
Supplement: c5md00259a1.pdf [file c5md00259a1.pdf]

## **Novel peptidomimetics related to Gonadotropin releasing hormone (GnRH)**

Arianna Gelain,<sup>1</sup> Luca Rizzi,<sup>1</sup> Laura Legnani,<sup>2</sup> Aurora Pacini,<sup>2</sup> Katerina Spyridaki,<sup>3</sup> Vlasios Karageorgos,<sup>3</sup> George Liapakis<sup>3</sup> and Stefania Villa<sup>1\*</sup>

<sup>1</sup>Dipartimento di Scienze Farmaceutiche, Università degli Studi di Milano, via L. Mangiagalli 25, 20133 Milano, Italy

<sup>2</sup>Dipartimento di Chimica, Università degli Studi di Pavia, via Taramelli 12, 27100 Pavia, Italy

<sup>3</sup>Department of Pharmacology, Faculty of Medicine, University of Crete, Voutes 71003, Heraklion, Crete, Greece.

# HPLC analysis

## Ia

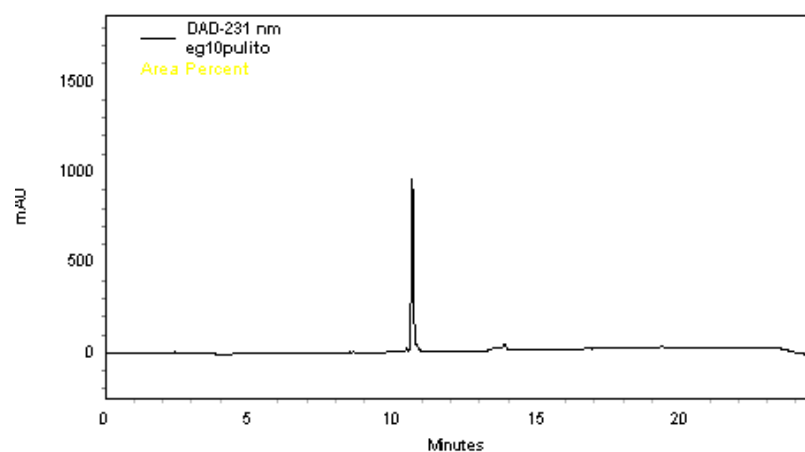

## Ib

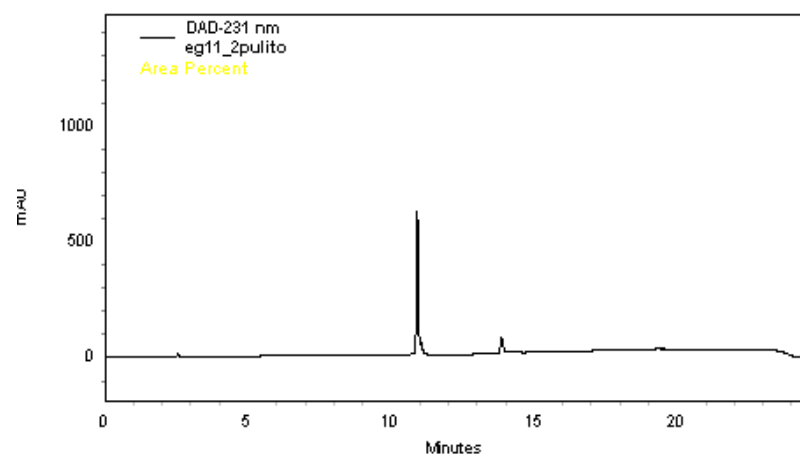

## Id

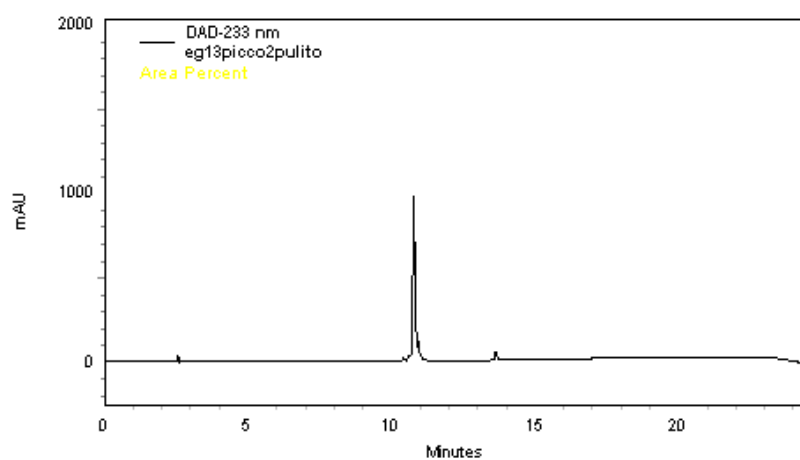

Ie

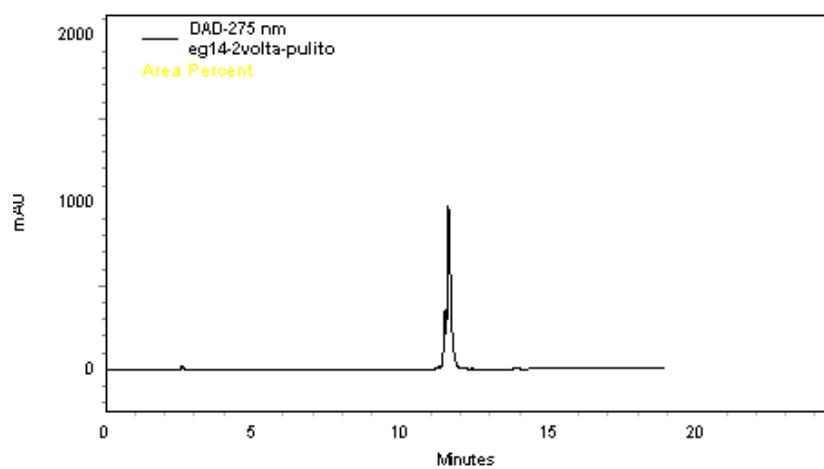

If

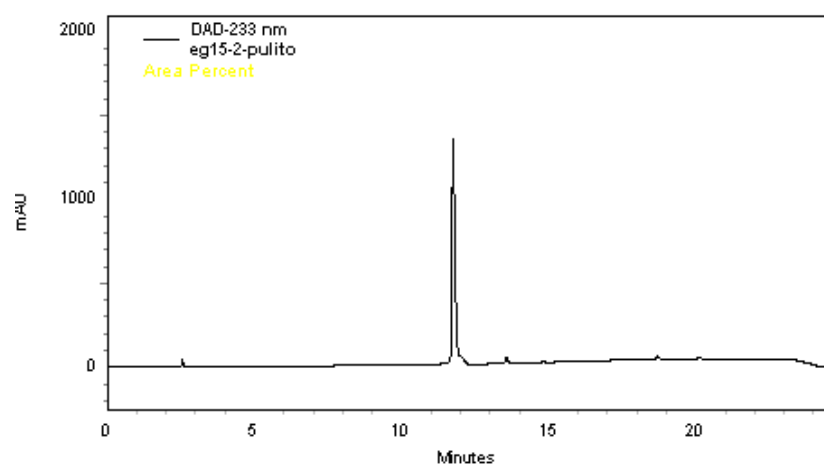

Ig

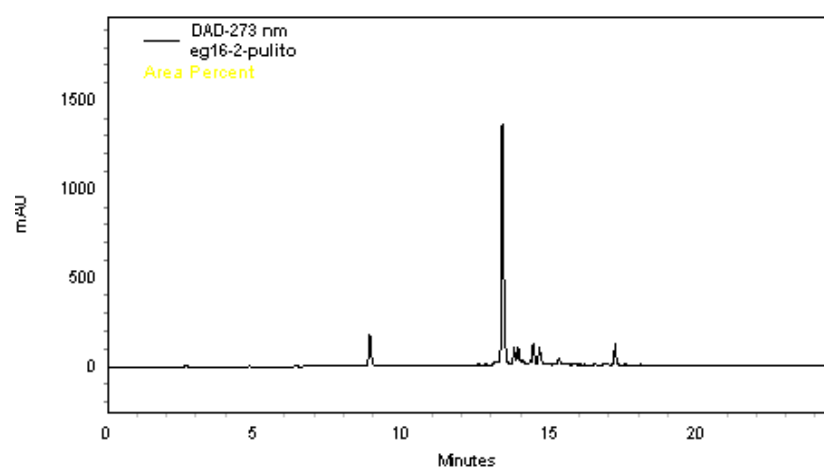

### IIa

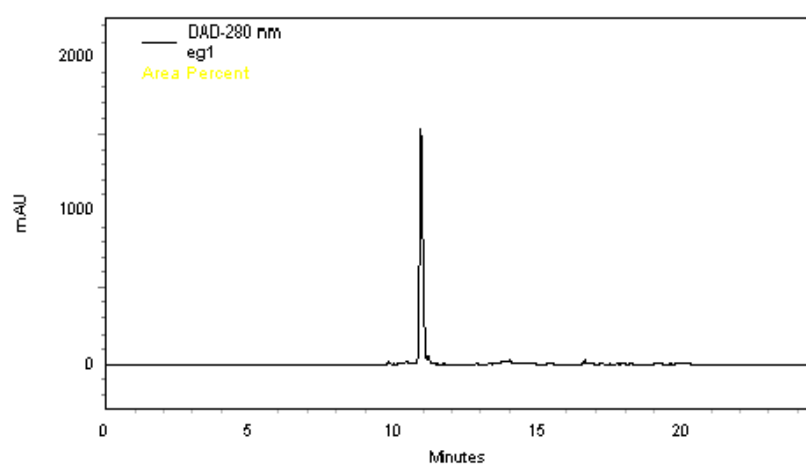

### IIb

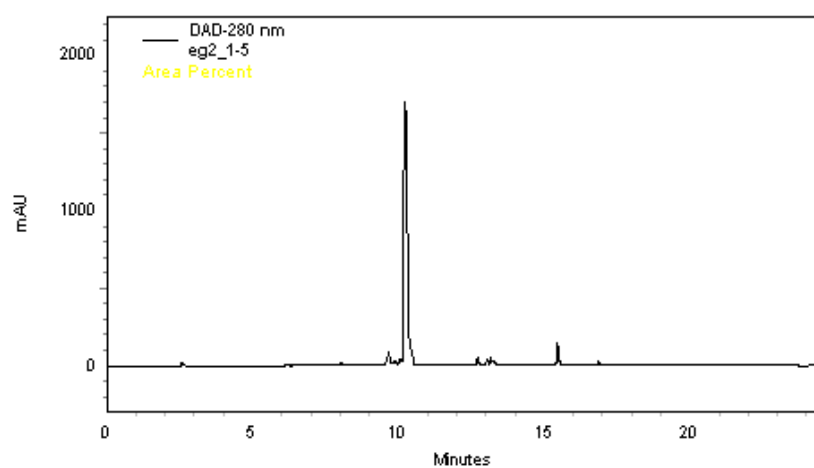

### IIc

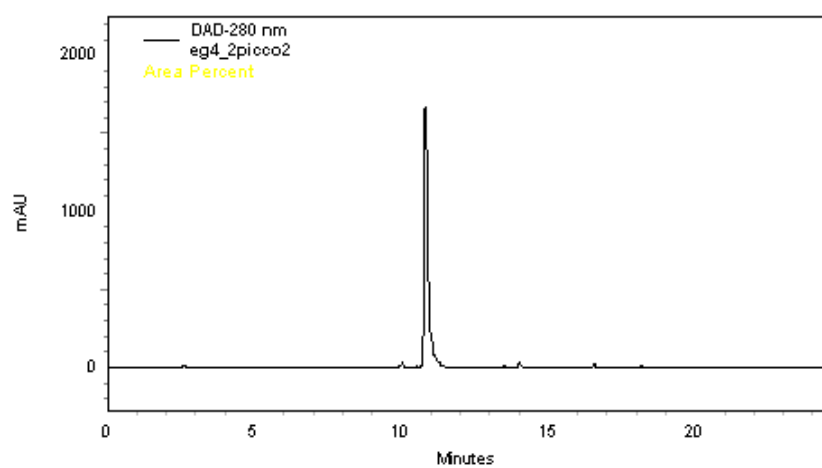

### II d

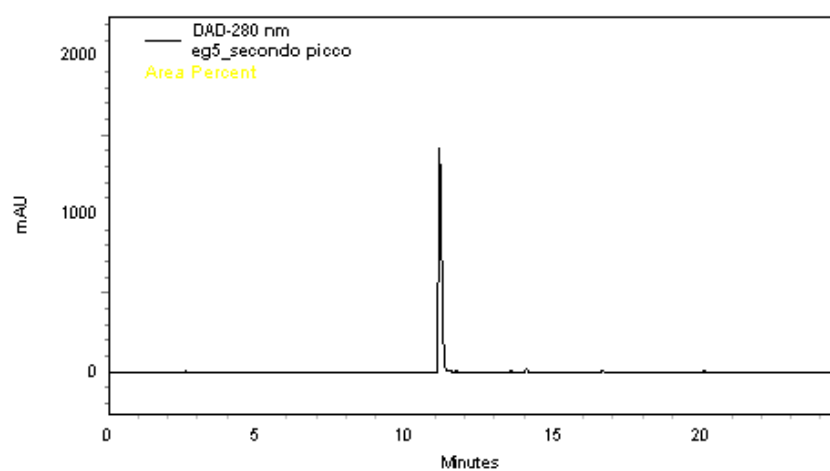

### II e

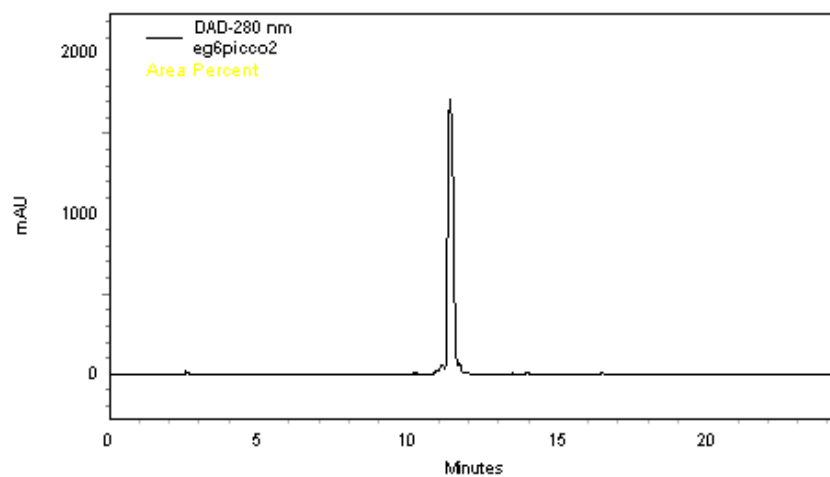

### II f

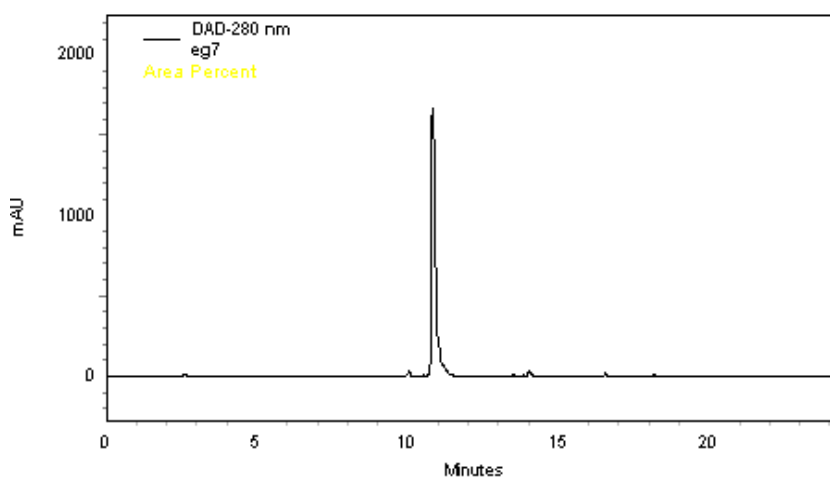

## IIg

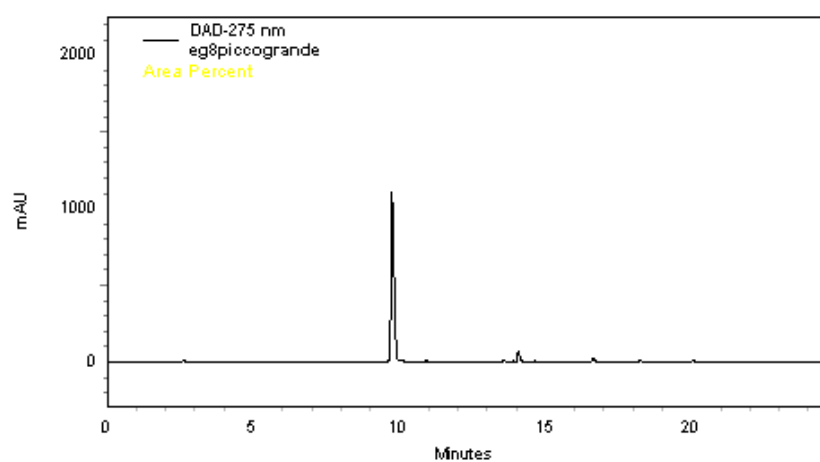

# MS analysis

Ia

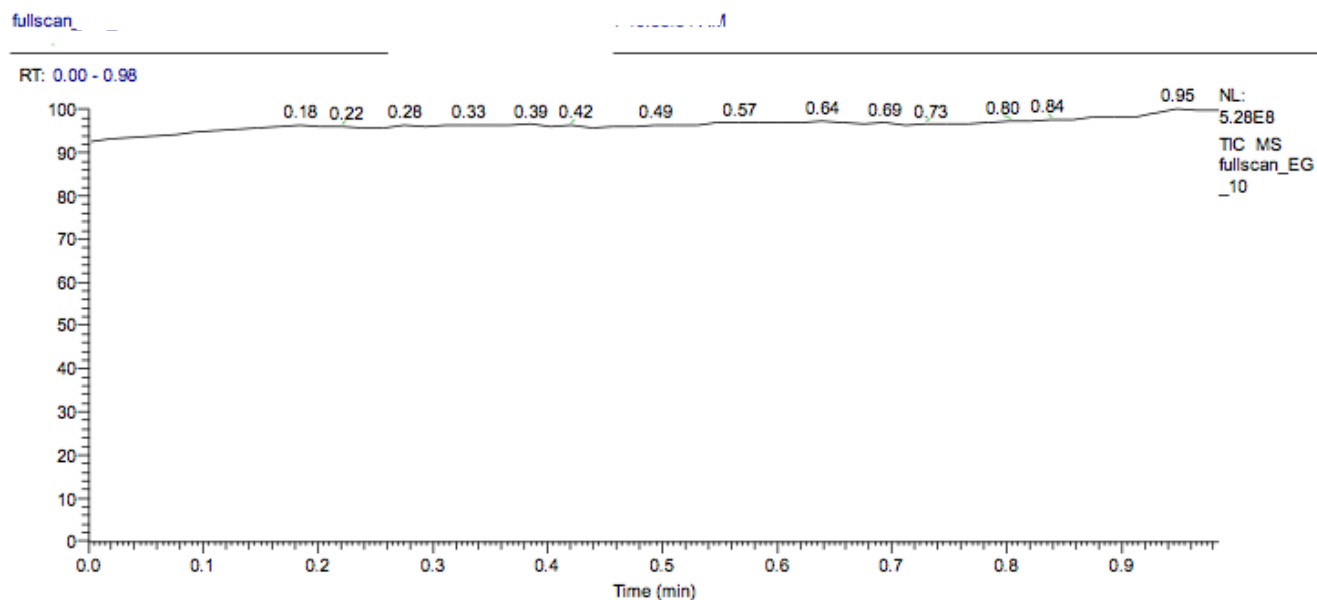

fullscan\_EG\_10 #1 RT: 0.00 AV: 1 NL: 5.80E6  
T: + p ESI sid=-38.00 Q1MS [49.970-1500.000]

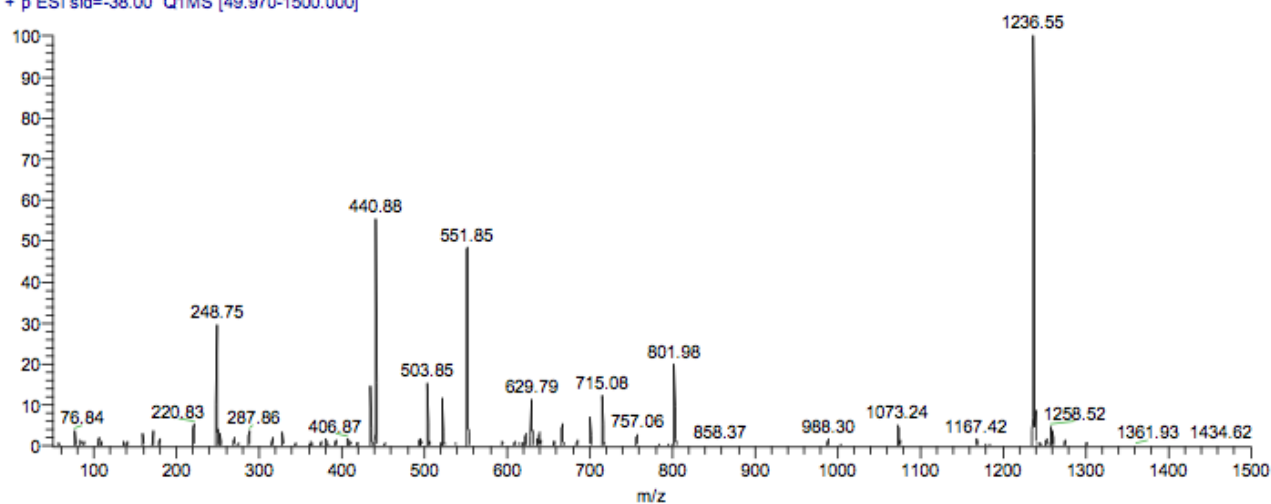

Ib

fullscan\_EG\_11\_2

07/2011 12:23:54 PM

RT: 0.00 - 1.00

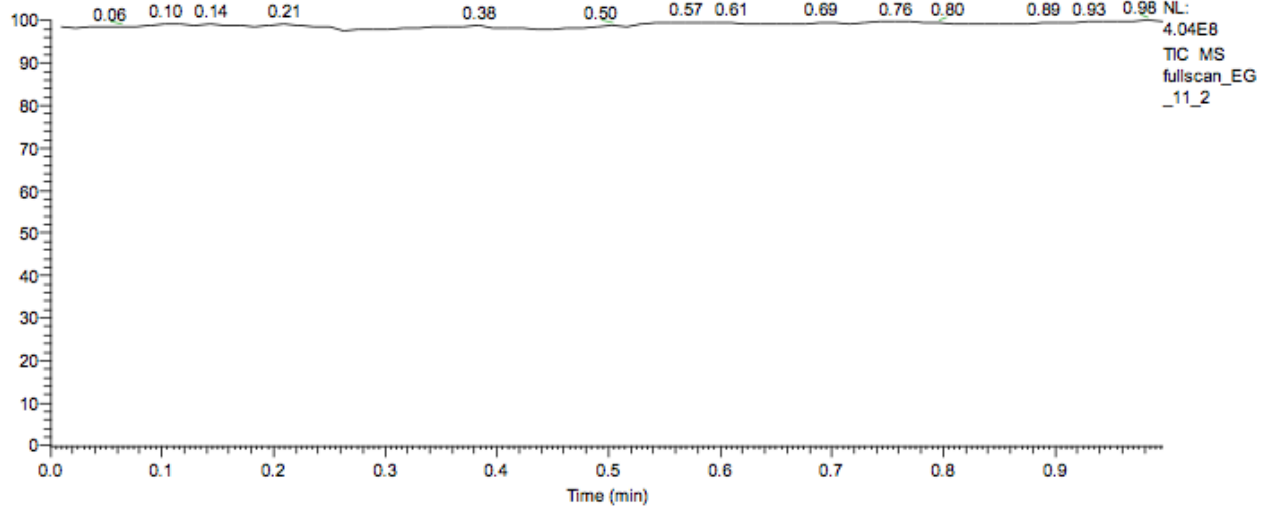

fullscan\_EG\_11\_2 #1 RT: 0.01 AV: 1 NL: 4.76E6  
T: + p ESI sid=-30.00 Q1MS [50.100-1500.000]

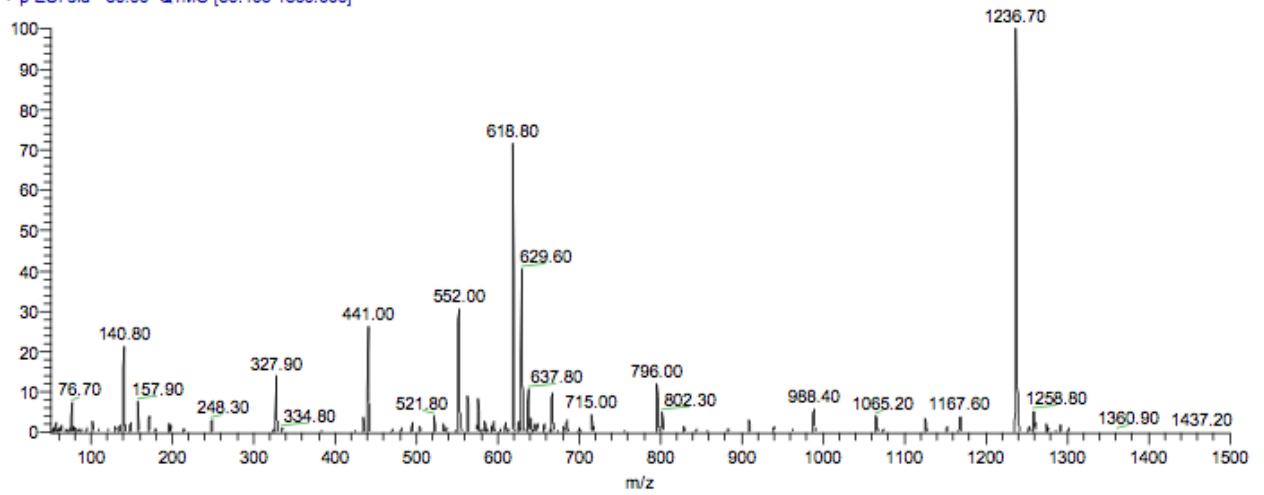



Id

fullscan\_EG\_13\_2

2/4/2011 10:17:49 AM

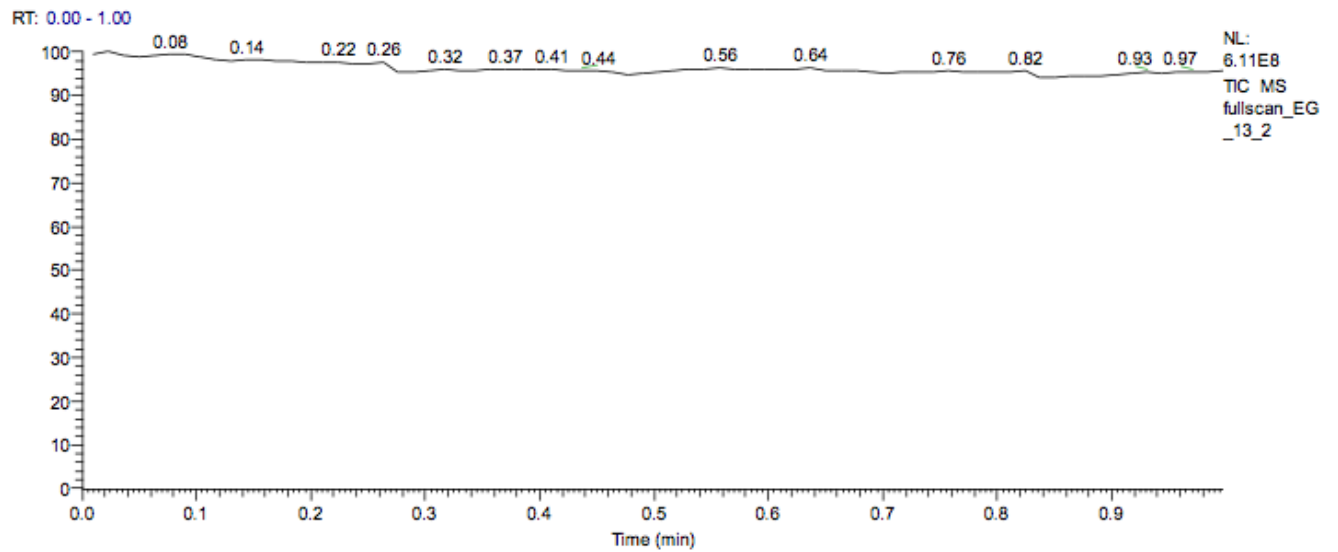

fullscan\_EG\_13\_2 #1 RT: 0.01 AV: 1 NL: 5.25E6  
T: + p ESI sid=-32.00 Q1MS [50.100-1500.000]

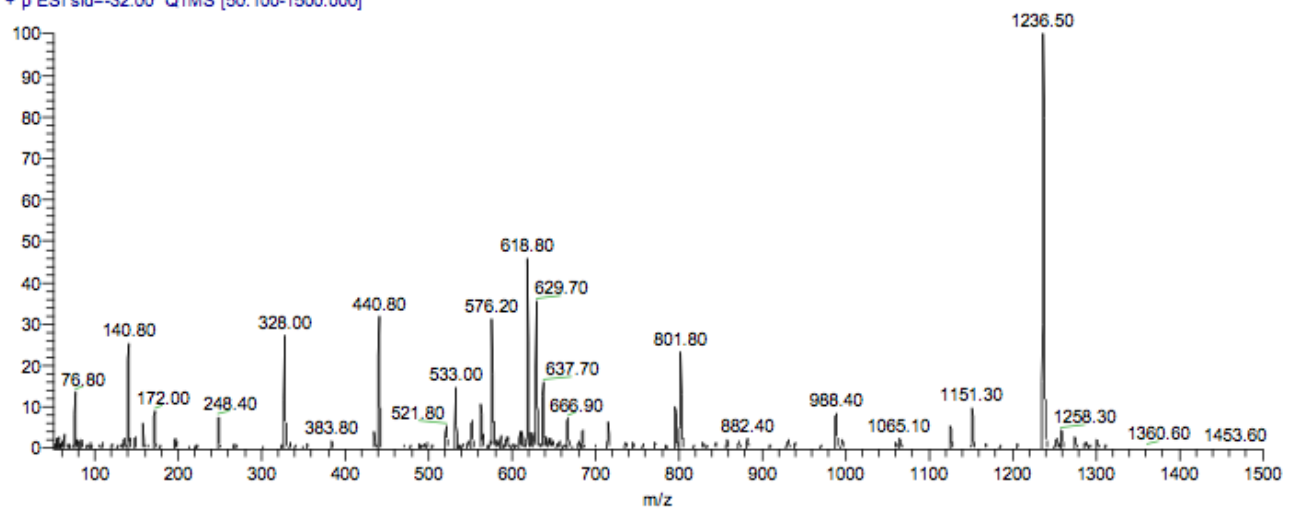

Ie

C:\Documents and Settings\...\EG14\_II

1/24/2011 2:37:15 PM

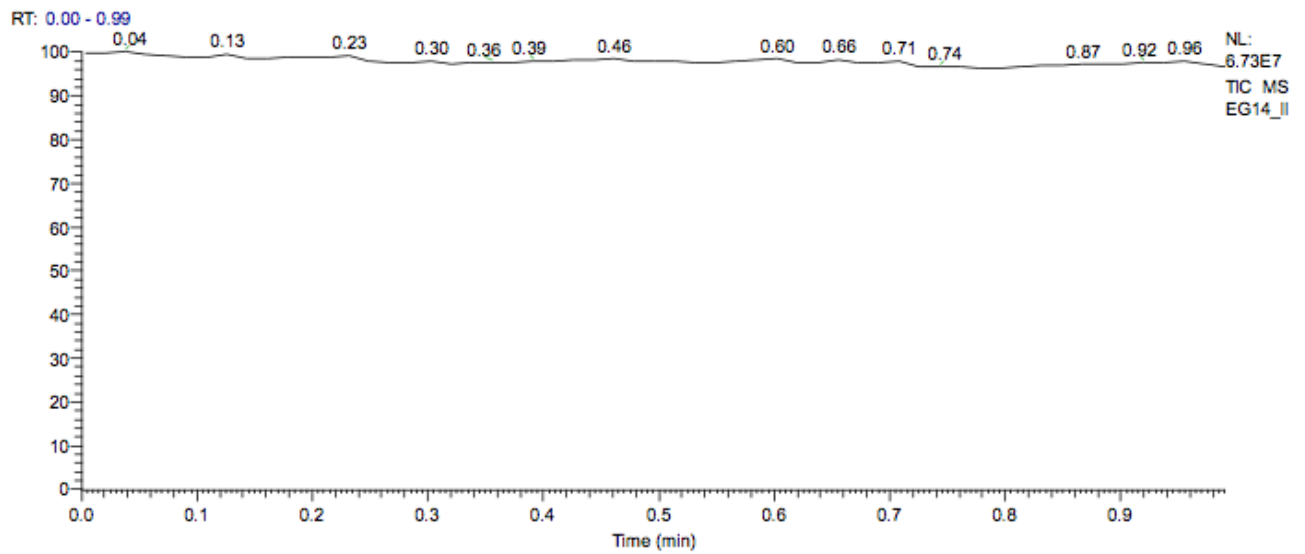

EG14\_II #1 RT: 0.00 AV: 1 NL: 7.09E6  
T: + c ESI sid=-30.00 Q1MS [50.000-1500.000]

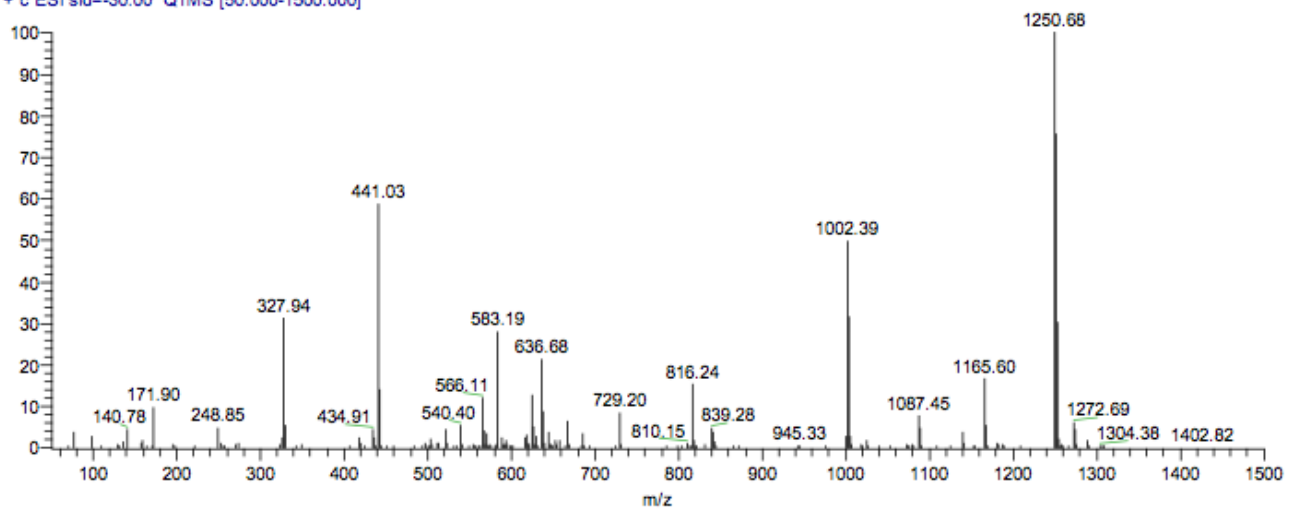

If

C:\Documents and Settings\...\EG15\_2

2/22/2011 5:21:51 PM

RT: 0.00 - 1.00

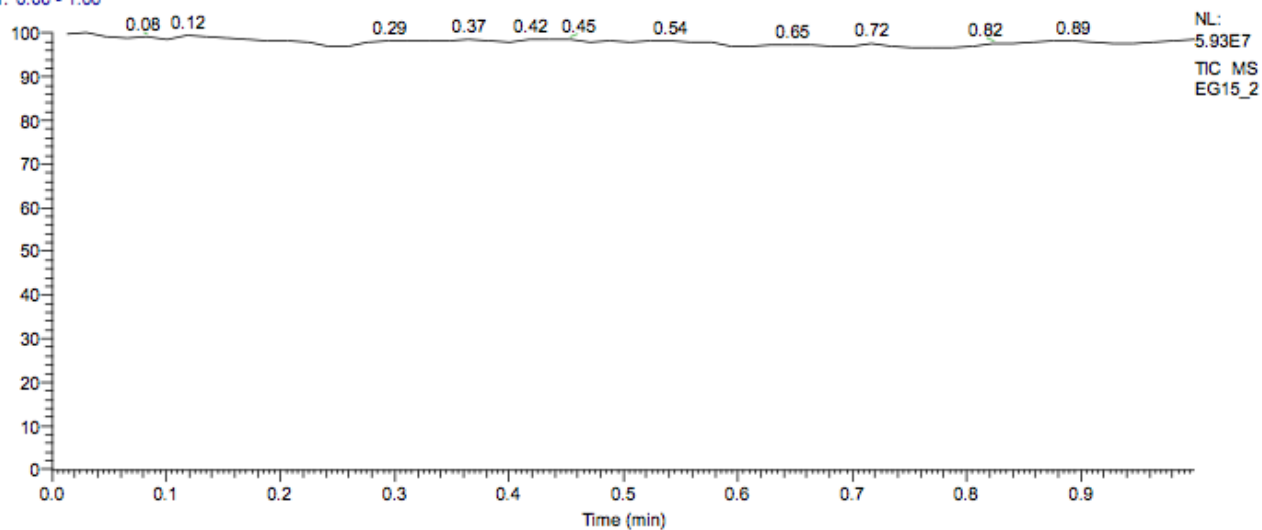

EG15\_2 #1 RT: 0.01 AV: 1 NL: 7.74E6  
T: + c ESI sid=-36.00 Q1MS [50.000-1500.000]

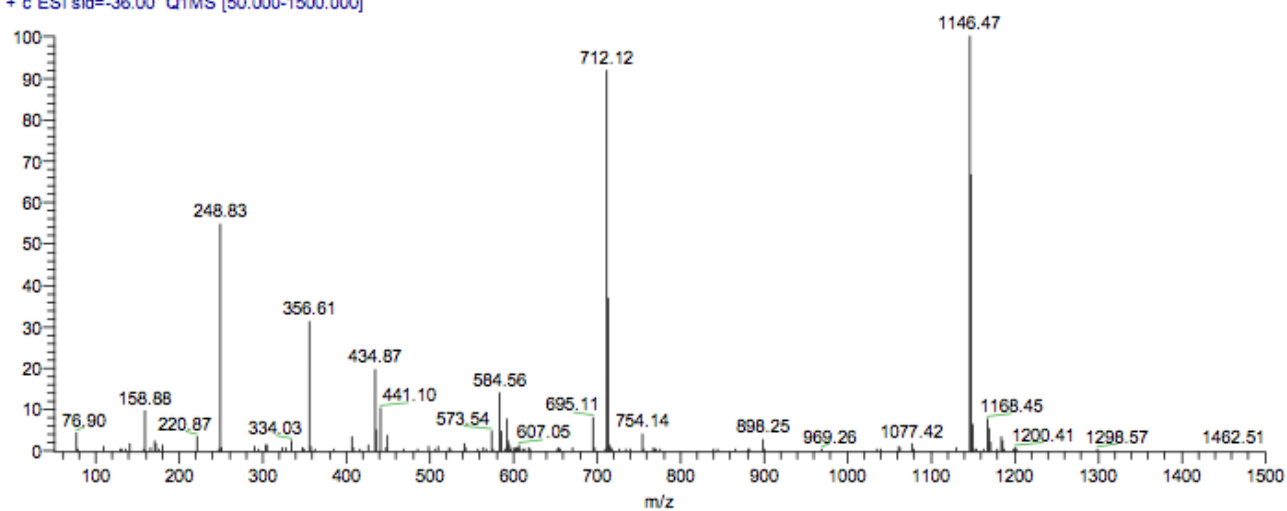

Ig

C:\Documents and Settings\...\EG16\_II

11/11/2011 3:38:44 PM

RT: 0.00 - 0.98

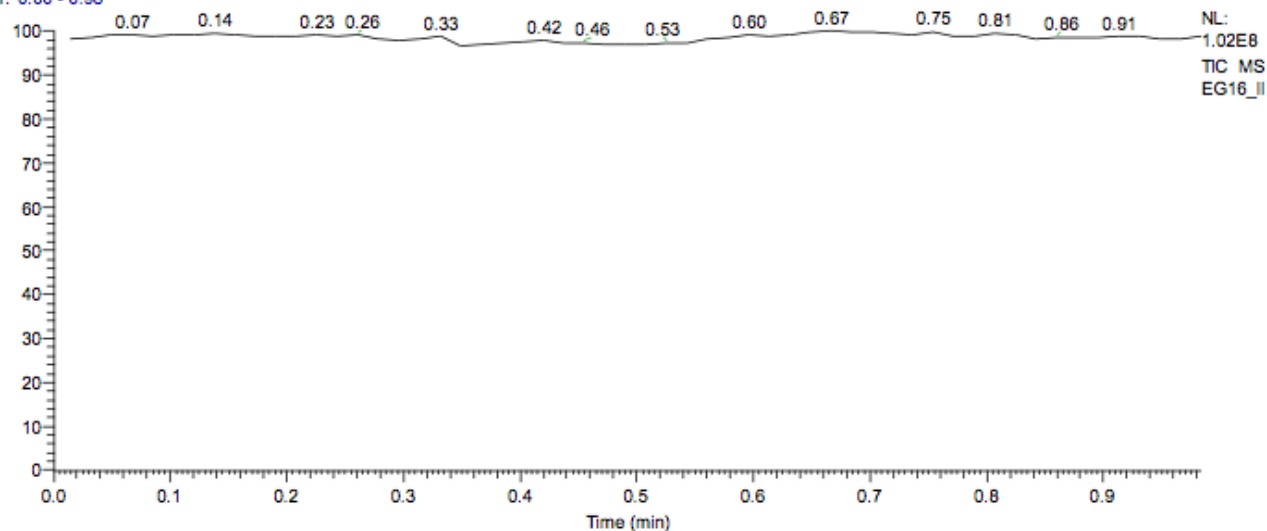

EG16\_II #1 RT: 0.01 AV: 1 NL: 1.48E7  
T: + c ESI sid=-28.00 Q1MS [50.000-1500.000]

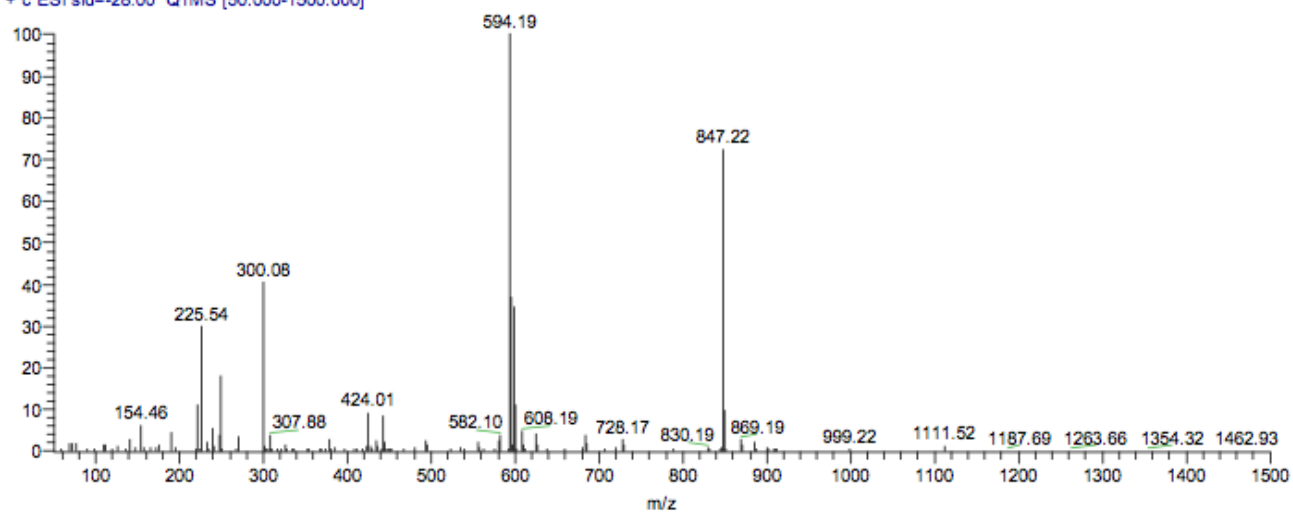

## IIa

fullscan\_EG\_2

2023-11-14 4:38:17 PM

RT: 0.00 - 1.00

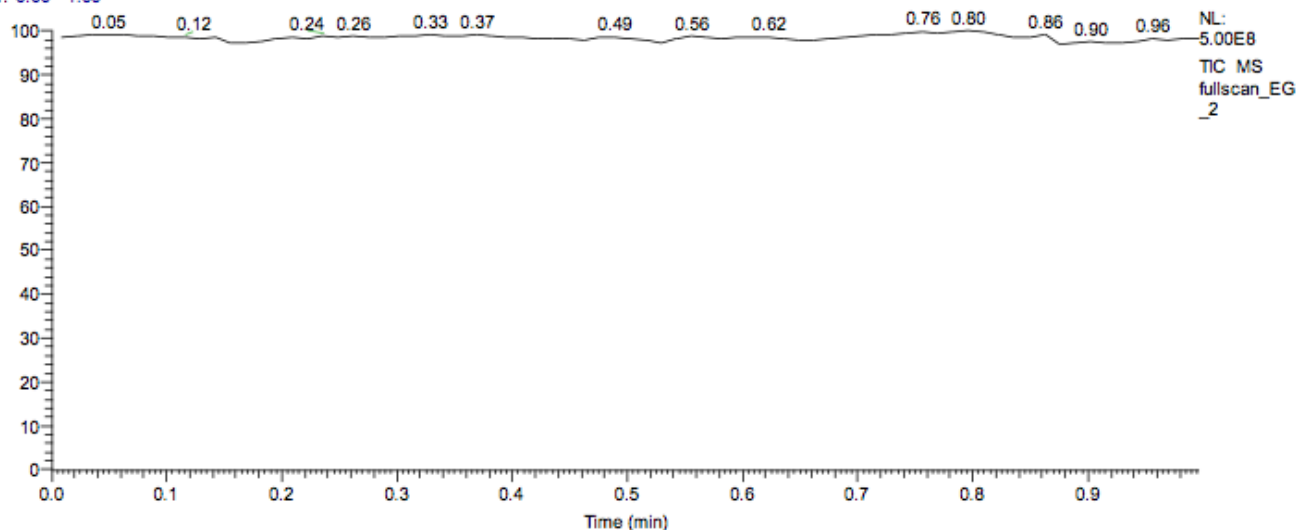

fullscan\_EG\_2 #1 RT: 0.01 AV: 1 NL: 1.02E7

T: + p ESI sid=-30.00 Q1MS [50.100-1500.000]

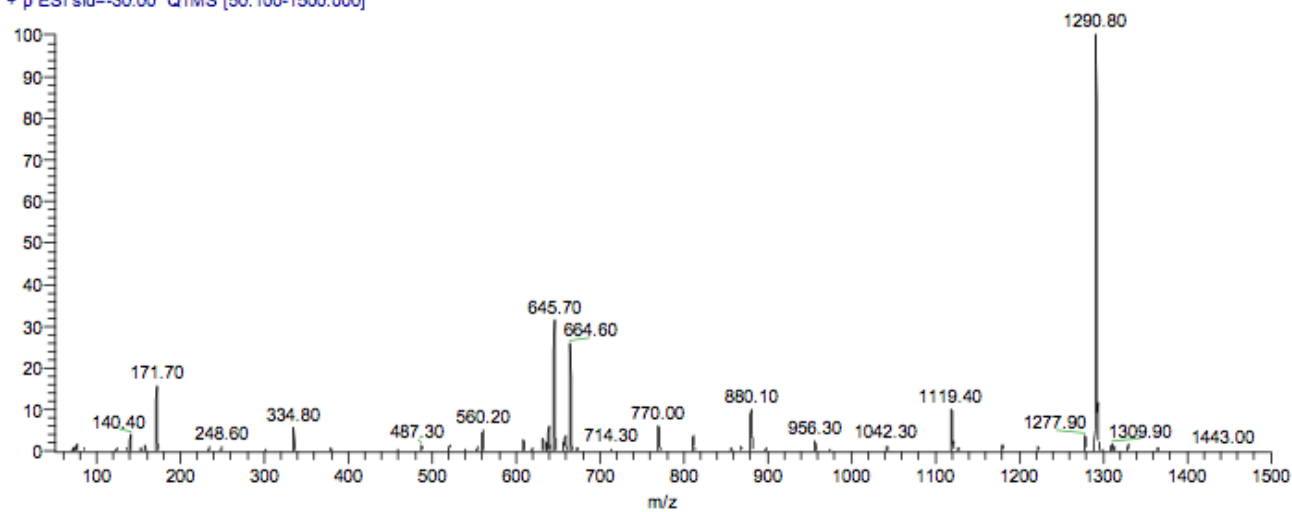

## IIb

fullscan\_EG\_2

2023/11/14 4:38:17 PM

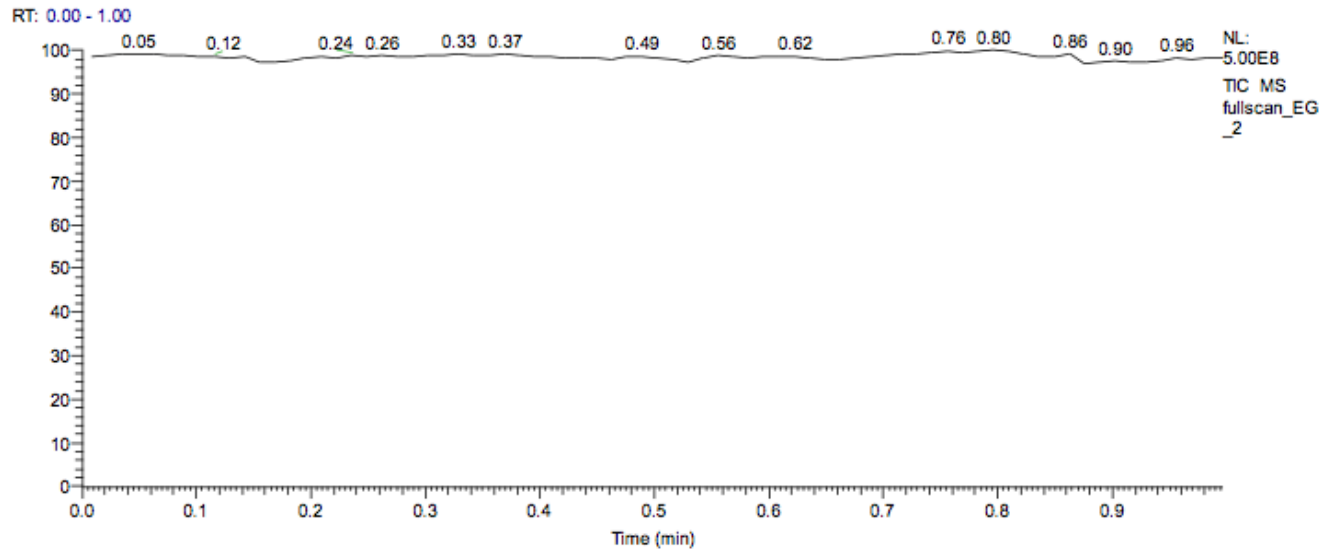

fullscan\_EG\_2 #1 RT: 0.01 AV: 1 NL: 1.02E7  
T: + p ESI sid=-30.00 Q1MS [50.100-1500.000]

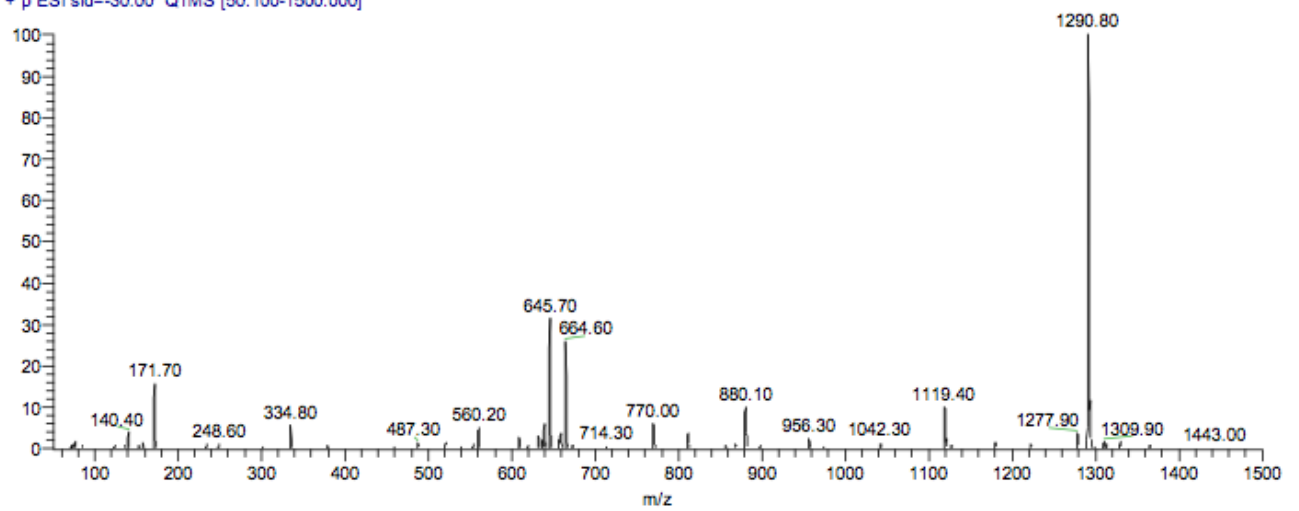

## IIc

fullscan\_EG\_4\_picco\_2

2/7/2011 4:06:56 PM

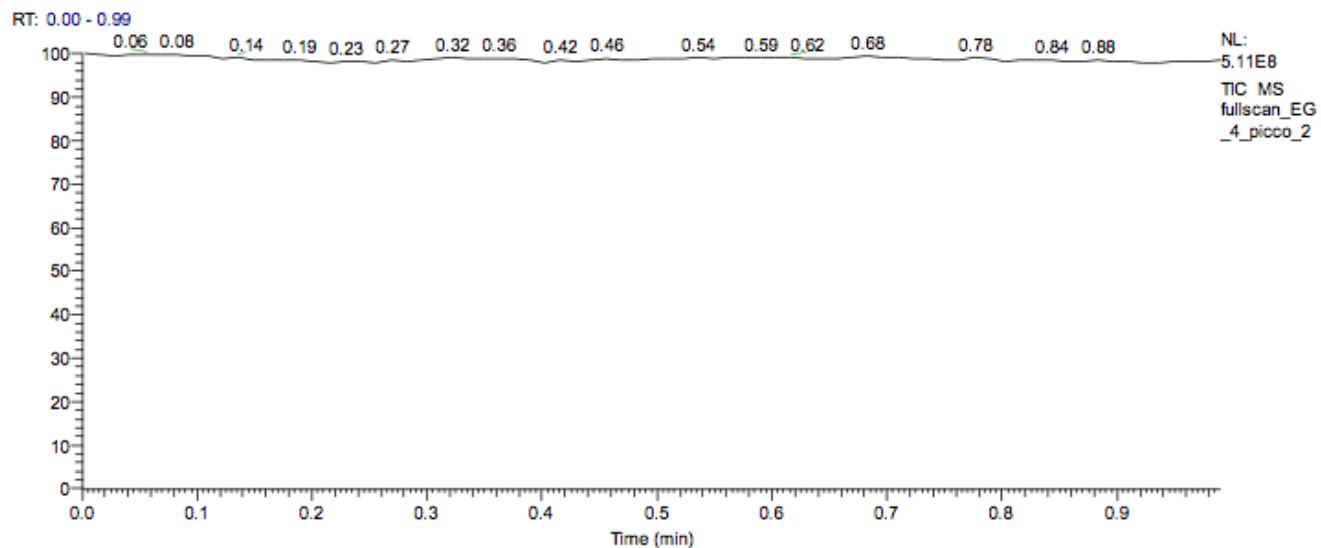

fullscan\_EG\_4\_picco\_2 #1 RT: 0.00 AV: 1 NL: 1.09E7  
T: + p ESI sid=-30.00 Q1MS [50.100-1500.000]

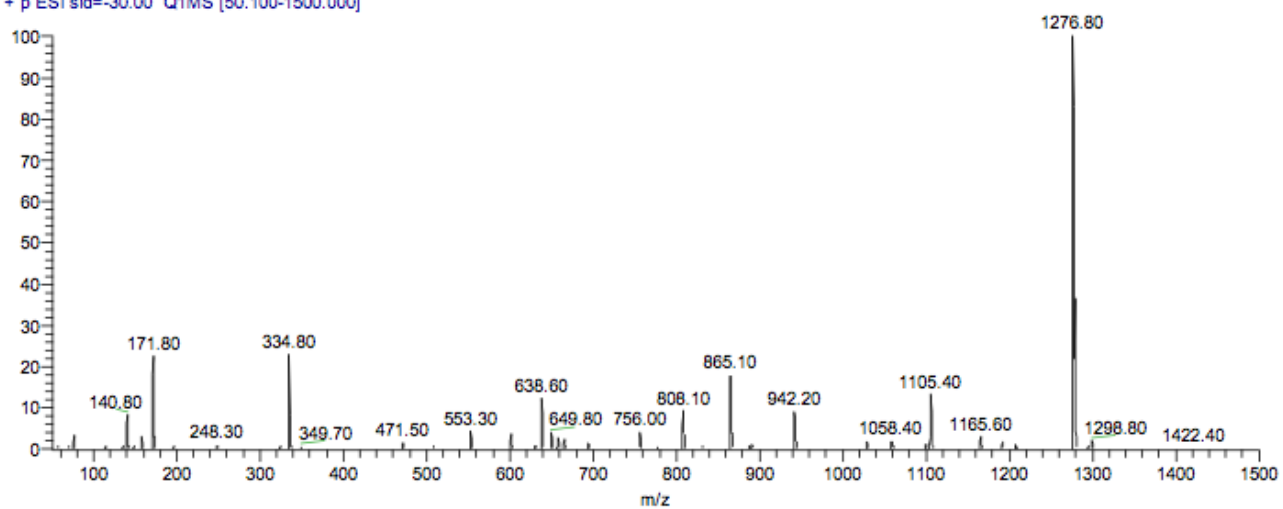

## II d

fullscan\_EG\_5\_p2

2011/03/11 11:35:40 AM

RT: 0.00 - 1.00

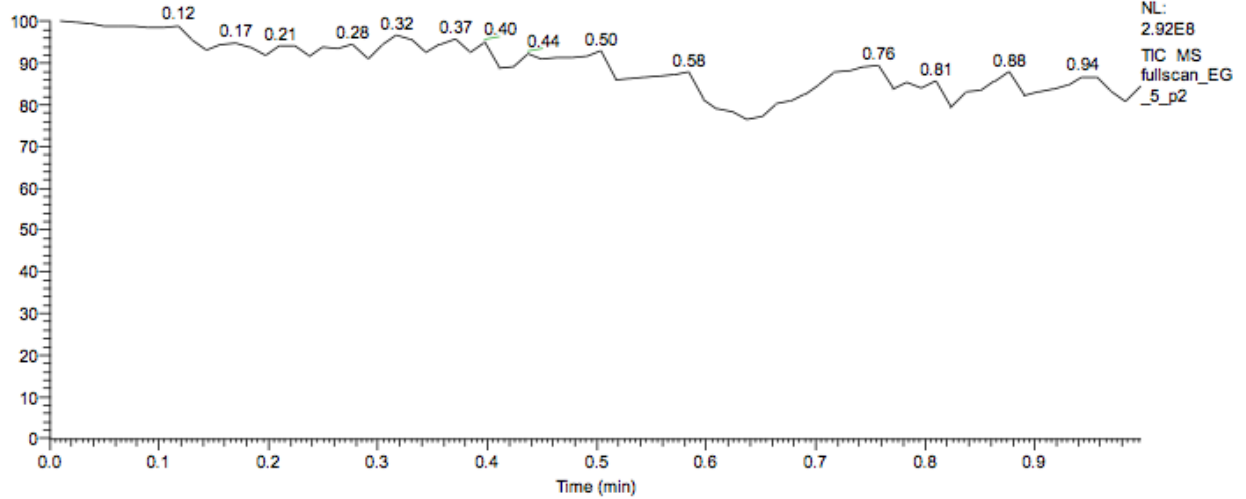

fullscan\_EG\_5\_p2 #1 RT: 0.01 AV: 1 NL: 5.21E6

T: + p ESI sid=-38.00 Q1MS [50.100-1500.000]

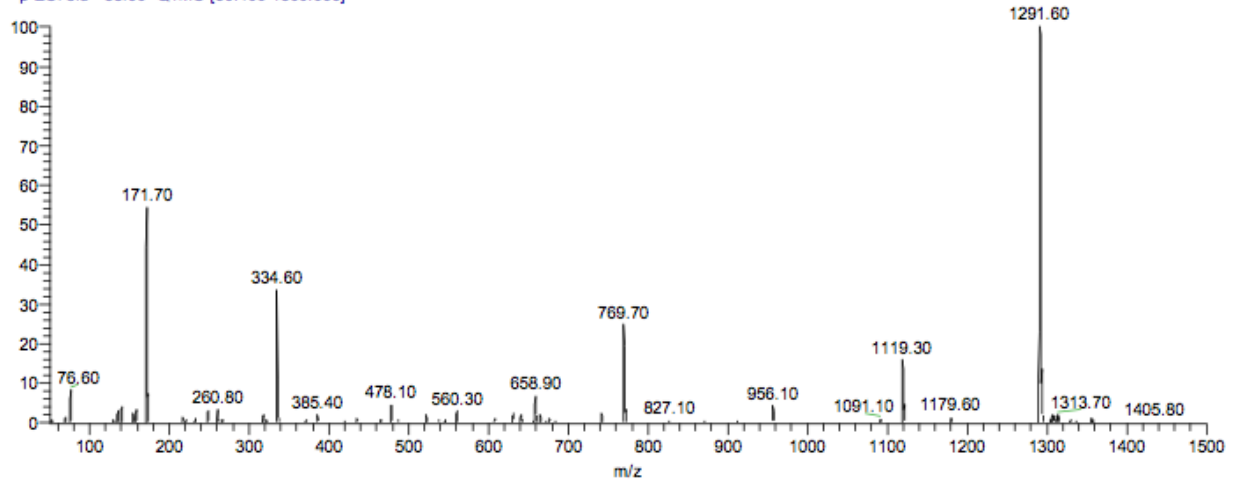



He

fullscan\_EG\_6\_p2

2023/08/11 2:21:39 PM

RT: 0.00 - 0.99

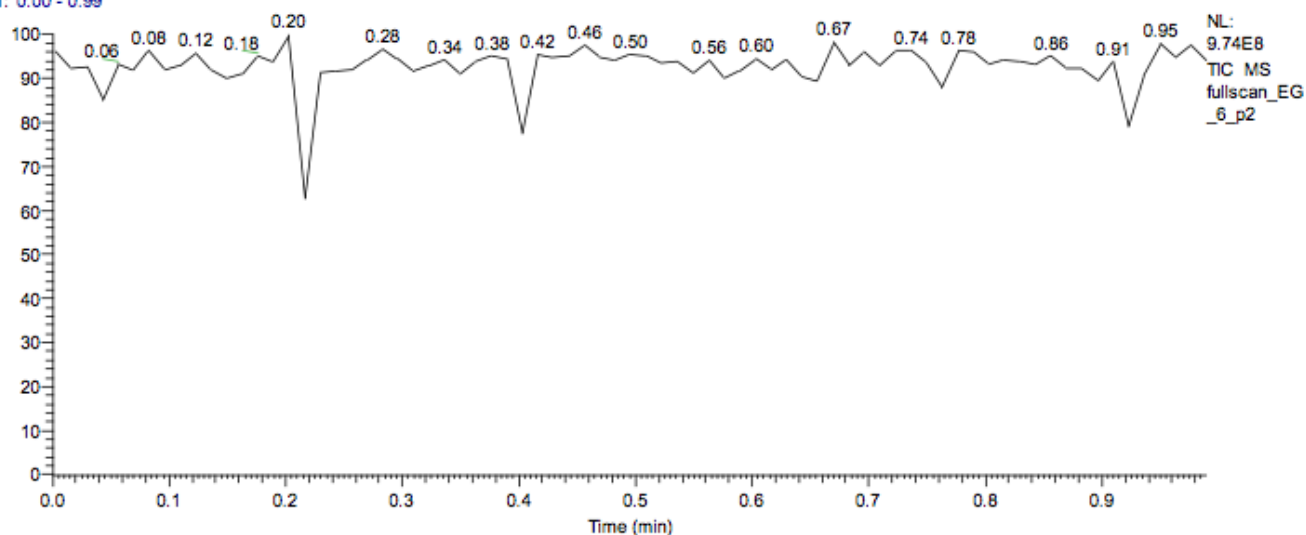

fullscan\_EG\_6\_p2 #1 RT: 0.00 AV: 1 NL: 1.49E7  
T: + p ESI sid=-30.00 Q1MS [50.100-1500.000]

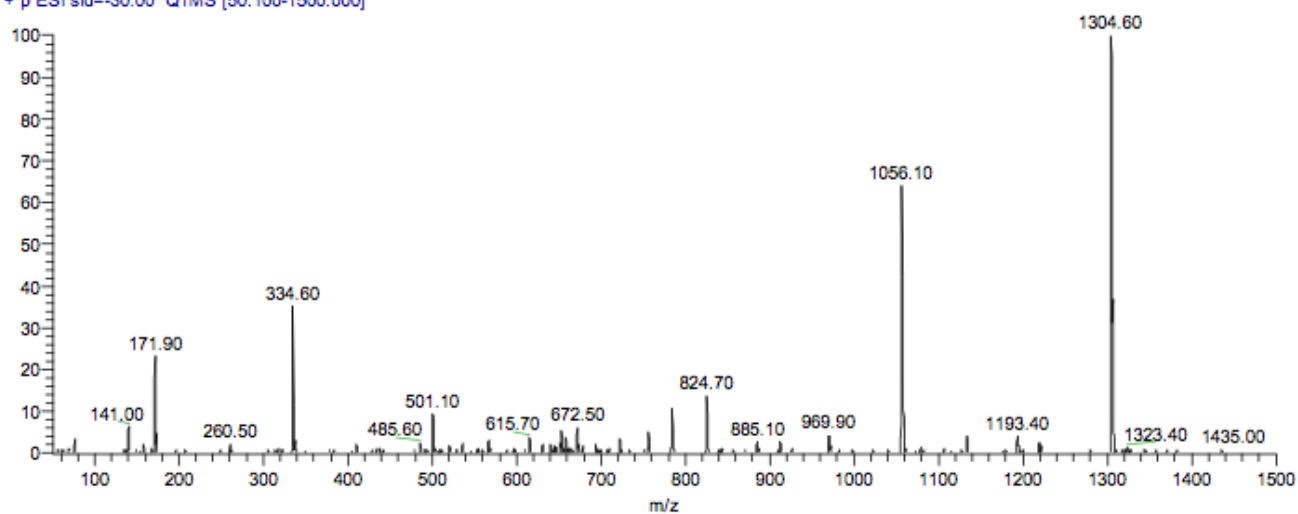

# II

C:\Documents and Settings\...\EG7\_4

2/22/2011 4:37:29 PM

RT: 0.00 - 0.99

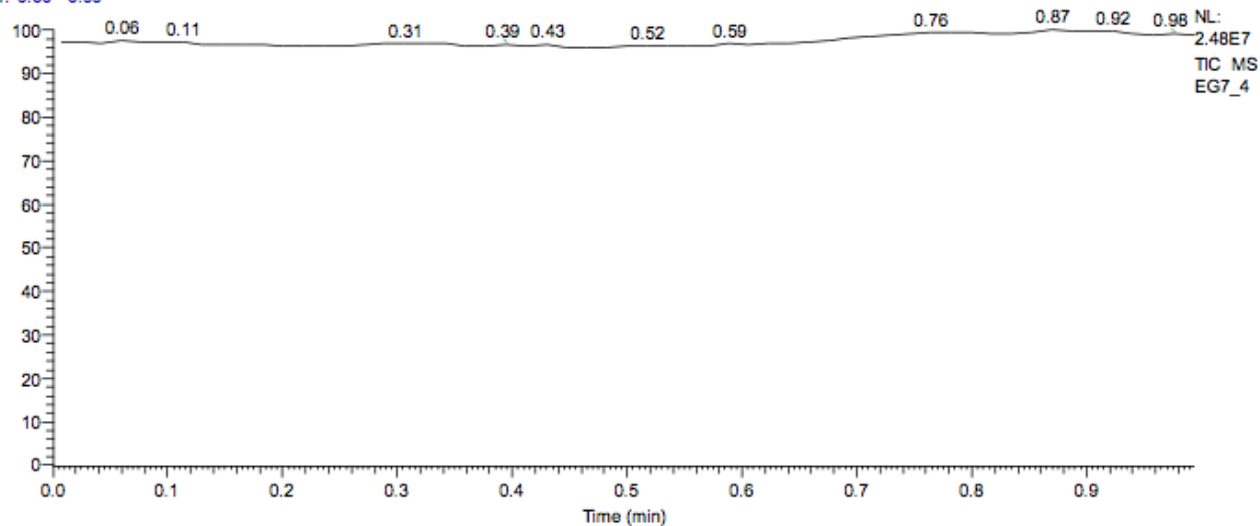

EG7\_4 #1 RT: 0.01 AV: 1 NL: 2.77E6  
T: + c ESI sid=-32.00 Q1MS [50.000-1500.000]

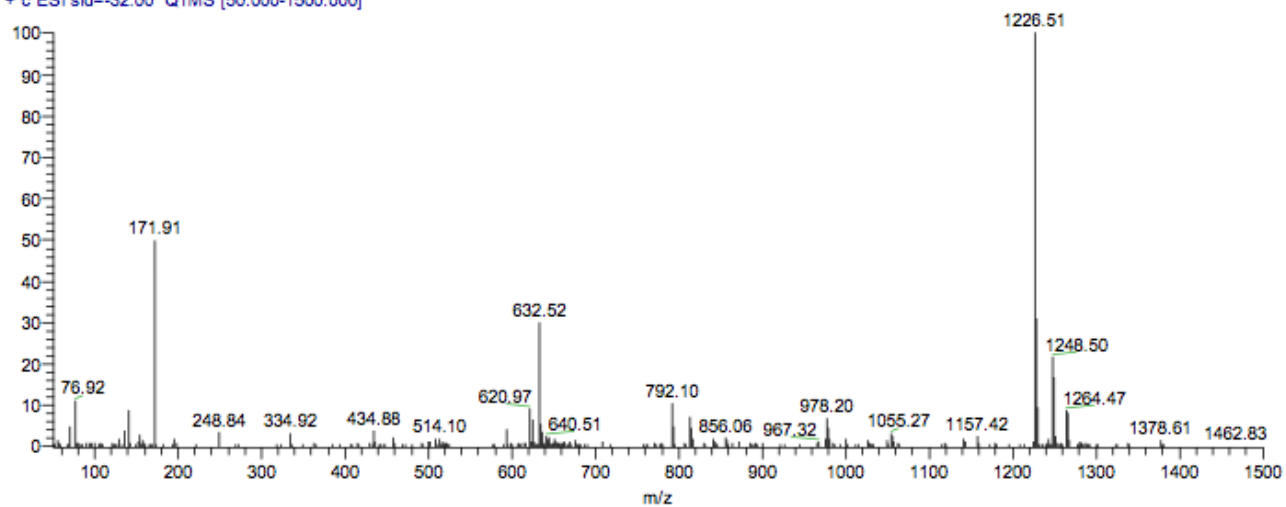

## Ilg

fullscan\_EG\_8\_picco\_grosso

2/1/2011 1:57:11 PM

RT: 0.00 - 1.00

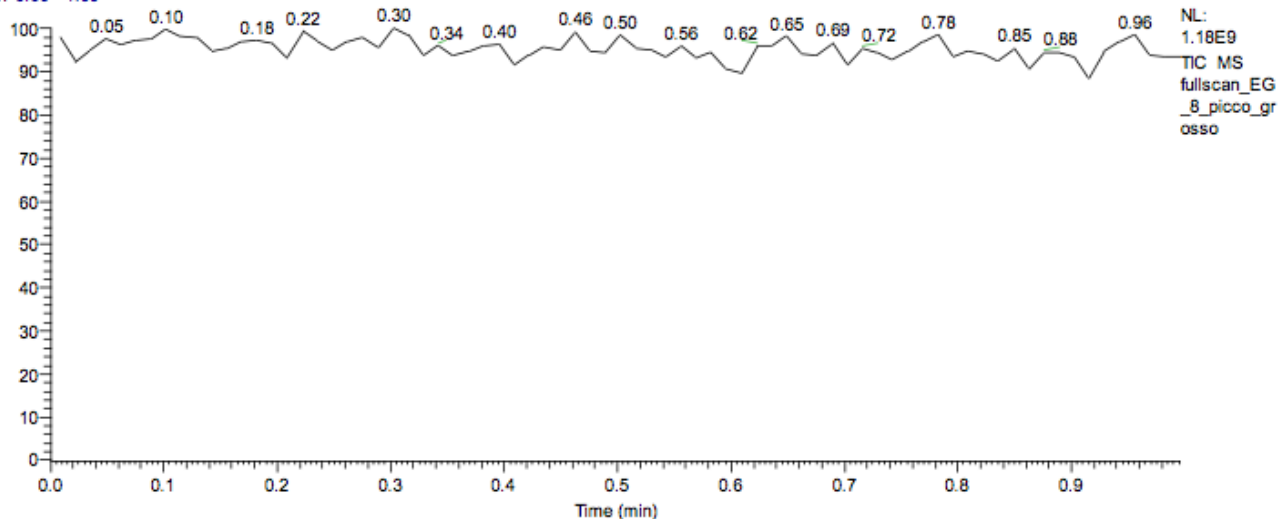

fullscan\_EG\_8\_picco\_grosso #1 RT: 0.01 AV: 1 NL: 5.24E7

T: + p ESI sid=-8.00 Q1MS [50.100-1500.000]

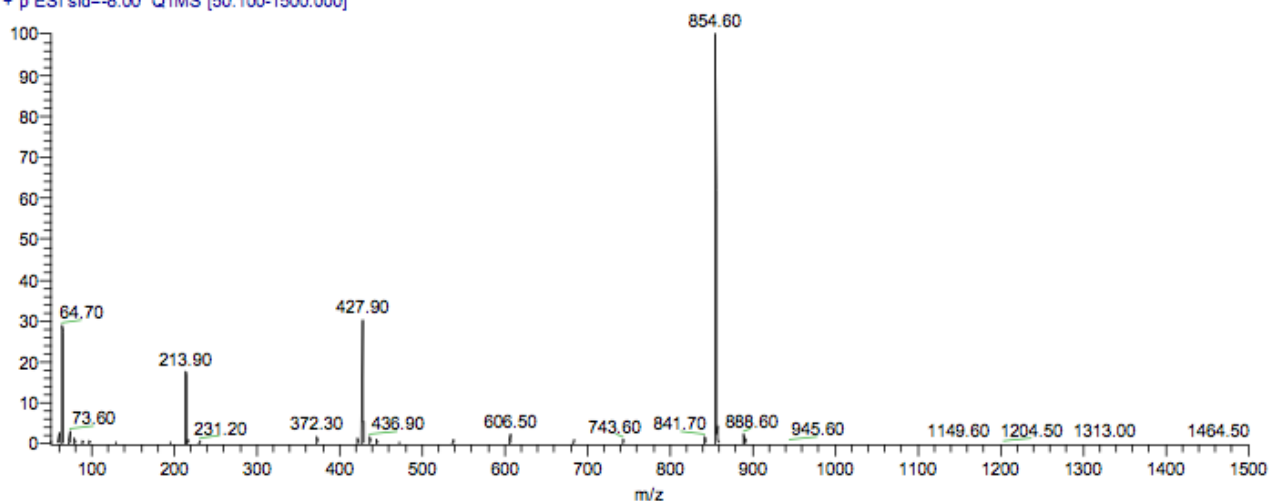

Model equation:  $Y = (Y_0 - \text{Plateau}) * \exp(-K * X) + \text{Plateau}$

|                          | GnRHI            | GnRHII             | Ie              | Ile             |
|--------------------------|------------------|--------------------|-----------------|-----------------|
| One phase decay          |                  |                    |                 |                 |
| Best-fit values          |                  |                    |                 |                 |
| Y0                       | 99.81            | 105.2              | 91.38           | 89.56           |
| PLATEAU                  | 2.026            | 0.7945             | 1.224           | 3.553           |
| K                        | 0.2636           | 0.2706             | 0.1751          | 0.2553          |
| Half Life                | 2.630            | 2.562              | 3.959           | 2.715           |
| Tau                      | 3.794            | 3.696              | 5.712           | 3.918           |
| Span                     | 97.78            | 104.4              | 90.16           | 86.01           |
| Std. Error               |                  |                    |                 |                 |
| Y0                       | 2.155            | 5.432              | 6.616           | 9.957           |
| PLATEAU                  | 2.876            | 7.195              | 10.38           | 13.41           |
| K                        | 0.02557          | 0.06155            | 0.06813         | 0.1312          |
| Span                     | 3.429            | 8.594              | 11.50           | 15.95           |
| 95% Confidence Intervals |                  |                    |                 |                 |
| Y0                       | 90.53 to 109.1   | 81.84 to 128.6     | 62.91 to 119.9  | 46.72 to 132.4  |
| PLATEAU                  | -10.35 to 14.40  | -30.16 to 31.75    | -43.44 to 45.88 | -54.17 to 61.28 |
| K                        | 0.1536 to 0.3736 | 0.005720 to 0.5354 | 0.0 to 0.4682   | 0.0 to 0.8197   |
| Half Life                | 1.855 to 4.514   | 1.295 to 121.2     |                 |                 |
| Tau                      | 2.677 to 6.512   | 1.868 to 174.8     |                 |                 |
| Span                     | 83.03 to 112.5   | 67.44 to 141.4     | 40.65 to 139.7  | 17.38 to 154.6  |
| Goodness of Fit          |                  |                    |                 |                 |
| Degrees of Freedom       | 2                | 2                  | 2               | 2               |
| R <sup>2</sup>           | 0.9976           | 0.9869             | 0.9700          | 0.9368          |
| Absolute Sum of Squares  | 16.00            | 100.8              | 166.4           | 344.9           |
| Sy.x                     | 2.828            | 7.099              | 9.122           | 13.13           |
| Constraints              |                  |                    |                 |                 |
| K                        | K > 0.0          | K > 0.0            | K > 0.0         | K > 0.0         |
| Number of points         |                  |                    |                 |                 |
| Analyzed                 | 5                | 5                  | 5               | 5               |

Metabolic stability of GnRHI-II and their derivatives **Ie** and **Ile**

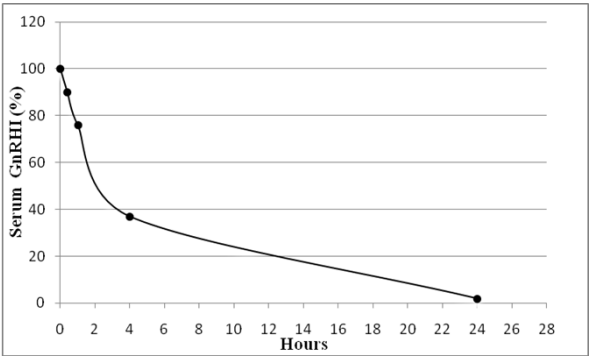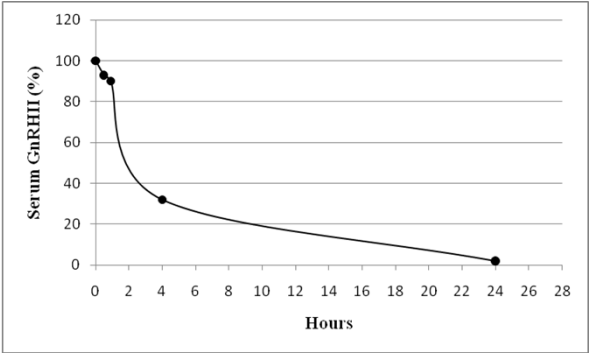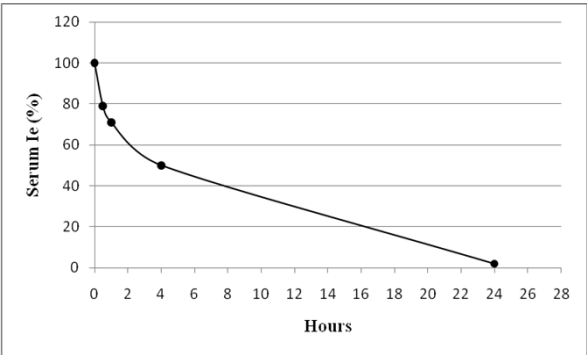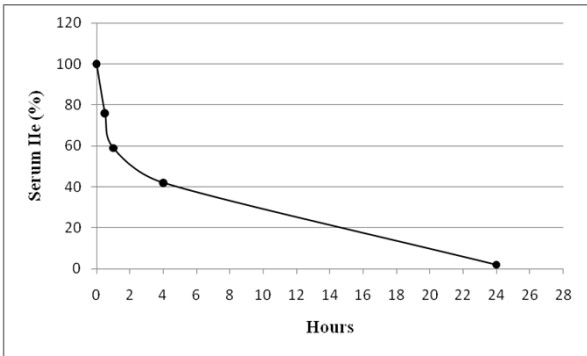

## CD Spectra

### Overlay GnRH I-Ie

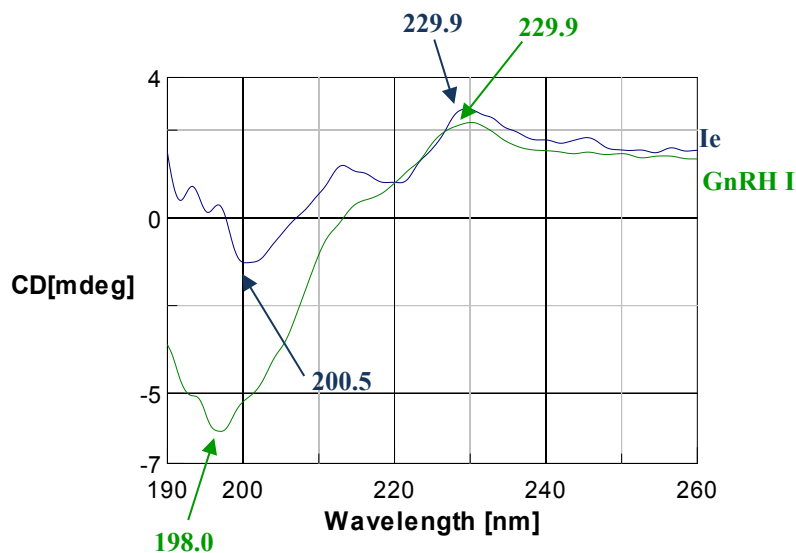

### Ile

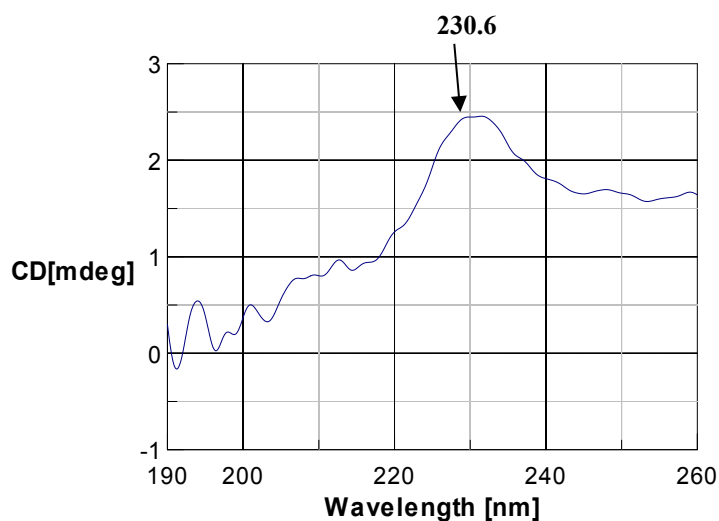

**Circular Dichroism:** Milli-Q H<sub>2</sub>O was used to prepare phosphate buffer at pH 7 with Na<sub>2</sub>HPO<sub>4</sub>·2H<sub>2</sub>O and NaH<sub>2</sub>PO<sub>4</sub>. Firstly, the samples were dissolved in 200 µL of milli-Q H<sub>2</sub>O (solution A). 10 µL of solution A were diluted in 2 mL of phosphate buffer (solution B) and then 500 µL (for **Ie**) and 300 µL (for **Ile**) of solution B were diluted in 2 mL of phosphate buffer giving the stock solutions. Aliquots of these stock solutions were taken to prepare the cuvette samples for spectrophotometric analyses. The CD spectra of the solutions were recorded with a Jasco J-710 spectropolarimeter from 190 to 260 nm in a 1 cm quartz cuvette through 10 accumulations.
